# Supplementary material for: Single-pot template-free synthesis of a glycerol-derived C–Si–Zr mesoporous composite catalyst for fuel additive production
Source: Royal Society of Chemistry journal article supplement (doi:10.1039/d0nj00523a), 2020-01-01
Supplement: d0nj00523a1.pdf [file d0nj00523a1.pdf]

## Supporting information

### Single-pot template-free synthesis of glycerol-derived C-Si-Zr mesoporous composite catalyst for fuel additives production

Saurabh Kumar,<sup>a&b</sup> Nagabhatla Viswanadham,<sup>\*a&b</sup> Sandeep K. Saxena,<sup>b</sup> Arumugam Selvamani,<sup>b</sup> Jitendra Diwakar<sup>a&b</sup> and Ala'a H. Al-Muhtaseb<sup>c</sup>

<sup>a</sup>Academy of Scientific and Innovative Research (AcSIR) at Council of Scientific & Industrial Research-Indian Institute of Petroleum, Dehradun-248005, Uttarakhand, India.

<sup>b</sup>Light Stock Processing Division, Indian Institute of Petroleum, Council of Scientific and Industrial Research, Dehradun-248005, India.

<sup>c</sup>Department of Petroleum and Chemical Engineering, College of Engineering, Sultan Qaboos University, Muscat 123, Oman

| Content    | Page No. |
|------------|----------|
| Scheme S1  | 3        |
| Figure S1  | 4        |
| Figure S2  | 4        |
| Figure S3A | 5        |
| Figure S3B | 5        |
| Figure S4  | 6        |
| Table S1   | 7        |
| References | 7-8      |

\*E-mail: nvish@iip.res.in; Fax: +91-135-2525702; Tel: +91-135-2525856.

## **1. Catalysts preparation**

### **1.1 Synthesis of -SO<sub>3</sub>H/C-Si and -SO<sub>3</sub>H/C-Zr catalyst**

The synthesis procedure of -SO<sub>3</sub>H/C-Si catalyst is almost similar to the preparation method of -SO<sub>3</sub>H/C catalyst. Here, we only added the TEOS (98% pure, Merk) to the initial glycerol right at the beginning of sulfonation and carbonization step resulted in the involvement of silica in the chemical interaction with the carbon. Similarly, addition of Zirconia (IV) oxynitrate (ZrO(NO<sub>3</sub>)<sub>2</sub>.xH<sub>2</sub>O) (99.5% pure, LOBAChemie Pvt. Ltd.) to the initial glycerol followed by simultaneous carbonization and sulfonation, such that chemical interaction occurred between zirconia and carbon.

### **1.2 Synthesis of -SO<sub>3</sub>H/C-Si-Zr catalyst**

The overall synthesis procedure consists of three main simple steps; (1) dissolving of zirconia (IV) oxynitrate in water; (2) mixing of glycerol with TEOS; and (3) mixing of the solutions (1) and (2), followed by simultaneous carbonization and sulfonation. For step (1), 20 g of ZrO(NO<sub>3</sub>)<sub>2</sub>.xH<sub>2</sub>O was dissolved into 20 ml of water and the solution was heated at 70-80 °C to make the clear solution. For step (2), 60 g of TEOS was mixing slowly into 20 g of glycerol with continuous stirring at the room temperature. Next, in step (3), solution (1) was added slowly into the solution (2) with continuous stirring at room temperature. Further, we followed the synthesis approaches, similar to the simultaneous carbonization and sulfonation step to facilitate the molecular level interaction of these elements with carbon.

## 2. Catalysts testing

### 2.1 Glycerol acetylation

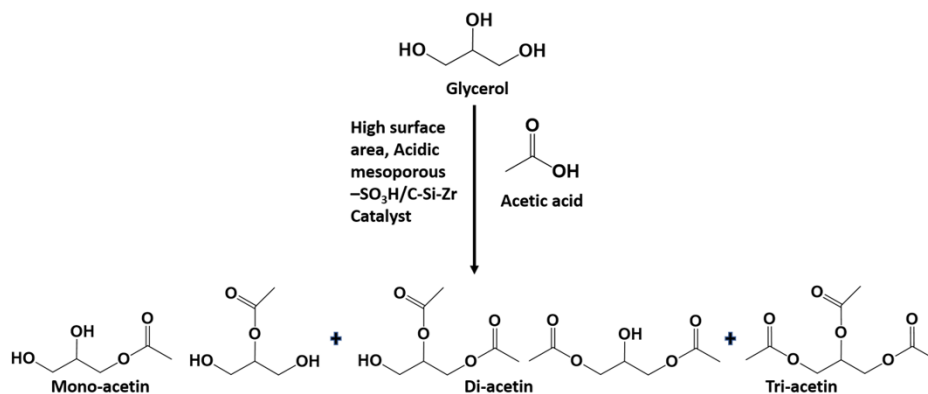

**Scheme S1.** Glycerol acetylation reaction over -SO<sub>3</sub>H/C-Si-Zr composite catalyst.

In a typical glycerol acetylation reaction, A batch reactor equipped with magnetic stirrer and condenser which charged with feed molar ratio (glycerol: acetic acid) 1:9 and 100 mg of the catalyst. The reactor was heated to desired reaction temperature (100 to 180 °C) for 5 h under continues stirring of mixture at 320 RPM and reflux condition. At the end of the reaction, the mixture was cooled up to room temperature. The reaction product and catalyst were separated by filtration and the catalyst was washed with distilled water and calcined at 300 °C for regeneration of catalyst for further uses. The reaction product was analysed by using Agilent GC (7890B) equipped with the HP-1 column (30m X 0.25mm) and Agilent MS (5977A) detector.

### 3. Supporting results

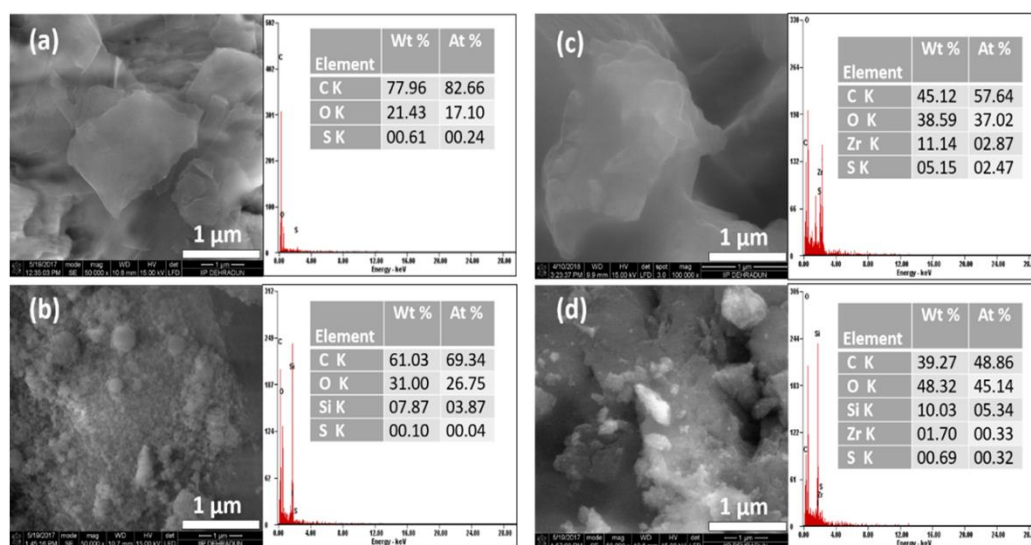

**Fig. S1** SEM images & EDX of samples: (a) -SO<sub>3</sub>H/C, (b) -SO<sub>3</sub>H/C-Si, (c) -SO<sub>3</sub>H/C-Zr and (d) -SO<sub>3</sub>H/C-Si-Zr

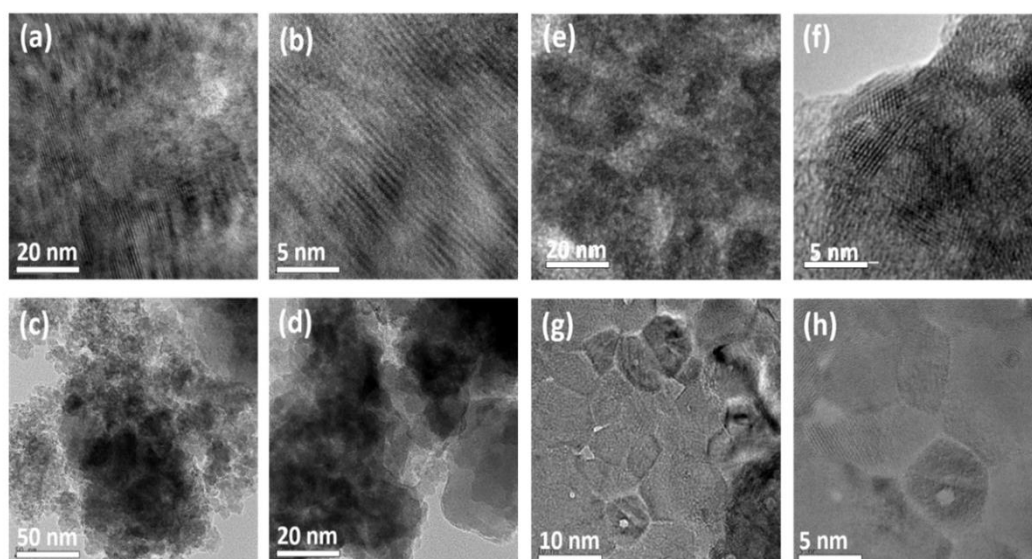

**Fig. S2** TEM images of samples: (a) (b) -SO<sub>3</sub>H/C, (c) (d) -SO<sub>3</sub>H/C-Si, (e) (f) -SO<sub>3</sub>H/C-Zr and (g) (h) -SO<sub>3</sub>H/C-Si-Zr

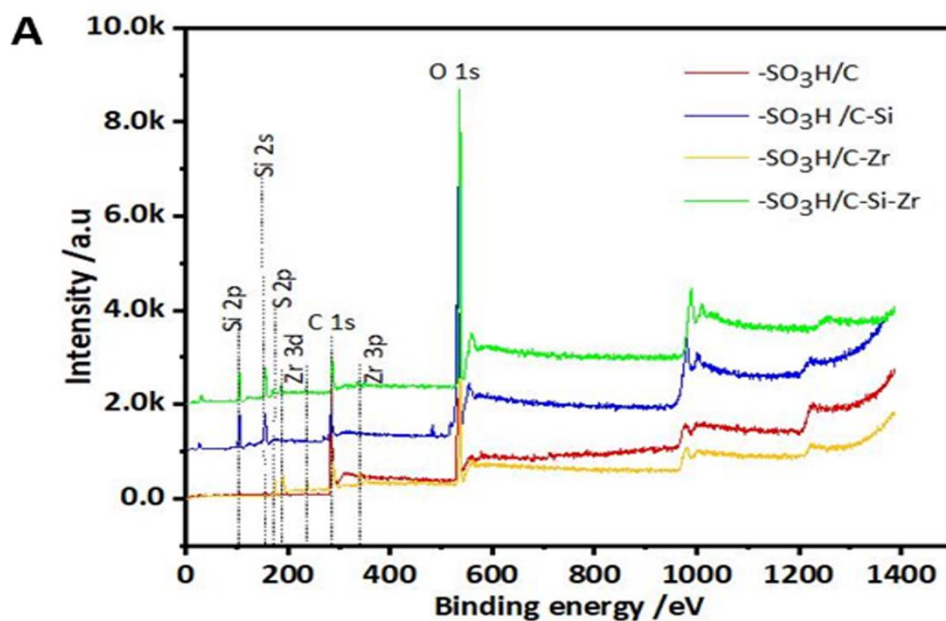

Fig. S3A XPS survey spectra of (a)  $-\text{SO}_3\text{H}/\text{C}$ , (b)  $-\text{SO}_3\text{H}/\text{C-Si}$ , (c)  $-\text{SO}_3\text{H}/\text{C-Zr}$  and (d)  $-\text{SO}_3\text{H}/\text{C-Si-Zr}$

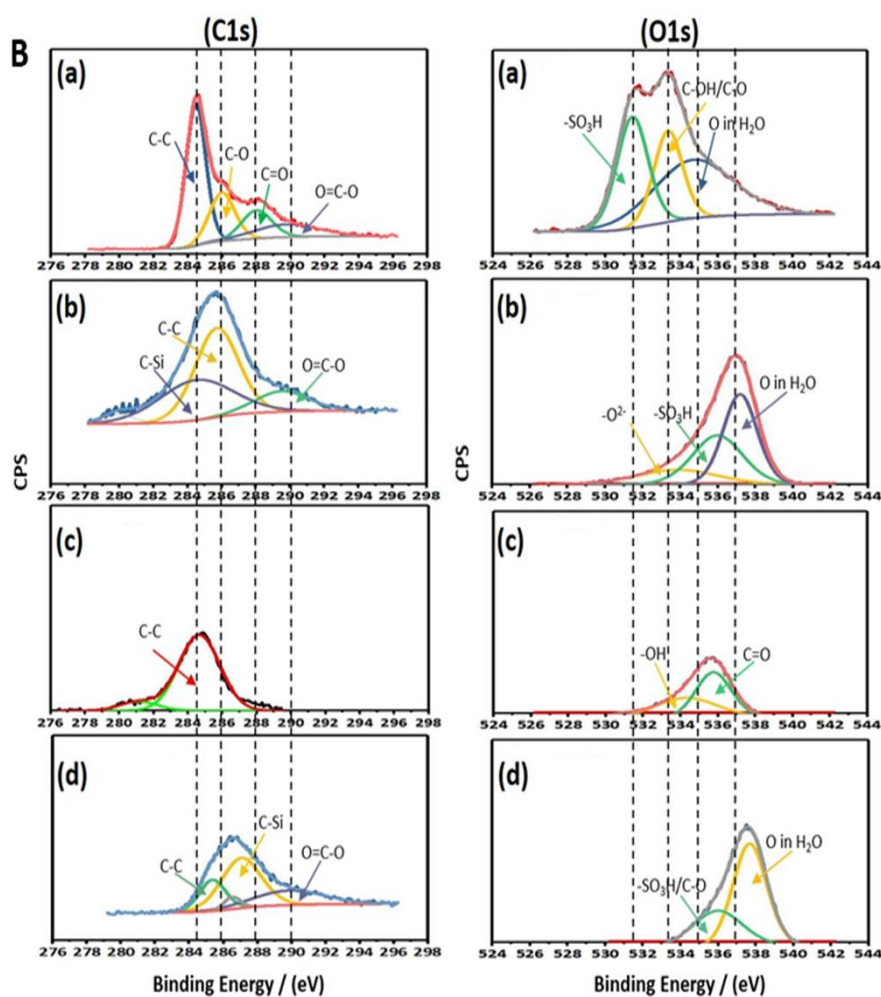

Fig. S3B XPS C1s and O1s spectra of samples: (a)  $-\text{SO}_3\text{H}/\text{C}$ , (b)  $-\text{SO}_3\text{H}/\text{C-Si}$ , (c)  $-\text{SO}_3\text{H}/\text{C-Zr}$  and (d)  $-\text{SO}_3\text{H}/\text{C-Si-Zr}$

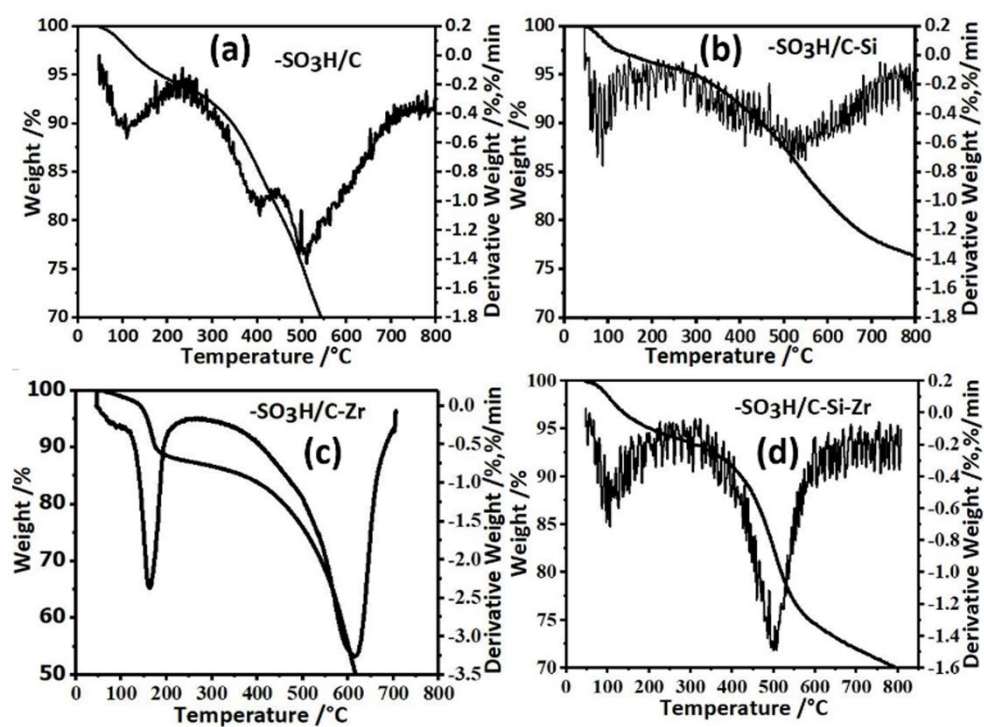

**Fig. S4** DT-TGA thermogram of the samples: (a)  $-\text{SO}_3\text{H}/\text{C}$ , (b)  $-\text{SO}_3\text{H}/\text{C-Si}$ , (c)  $-\text{SO}_3\text{H}/\text{C-Zr}$  and (d)  $-\text{SO}_3\text{H}/\text{C-Si-Zr}$

## 4. Supporting Tables

**Table S1** Performance comparison of the present catalysts with reported for glycerol acetylation reaction.

| S. No. | Catalyst                           | Temp (°C) | RT (h) | Conv. (%) | Selectivity (%) |      |      | Ref. |
|--------|------------------------------------|-----------|--------|-----------|-----------------|------|------|------|
|        |                                    |           |        |           | MA.             | DA.  | TA.  |      |
| 1      | -SO <sub>3</sub> H/C-Si-Zr*        | 150       | 5      | 96.7      | 2.3             | -    | 97.7 |      |
| 2      | TPA3/MCM-41                        | 100       | 6      | 87        | 25              | 60   | 15   | 1    |
| 3      | TPA <sub>3</sub> /ZrO <sub>2</sub> | 80        | 8      | 80        | 60              | 36   | 4    |      |
| 4      | Amberlyst-15                       | 80        | 8      | 100       | 21.1            | 63.8 | 15.1 | 2    |
| 7      | PrSO <sub>3</sub> H-SBA-15         | 80        | 8      | 100       | 15.8            | 64.6 | 19.6 |      |
| 17     | Amberlyst-36                       | 105       | 10     | 95.6      | 70.3            | 4.5  | –    | 3    |
| 19     | Dowex-2                            | 105       | 10     | 95.2      | 80.8            | 5.1  | –    |      |
| 22     | Amberlyst-15(dried)                | 110       | 5      | 97.1      | 7.8             | 47.7 | 44.5 | 4    |
| 25     | SBAH-15(15)                        | 110       | 3      | 100       | 14              | 67   | 19   | 5    |
| 27     | PW2_AC                             | 120       | 3      | 86        | 25              | 63   | 11   | 6    |
| 28     | AC-SA5                             | 120       | 3      | 91        | 38              | 28   | 34   | 7    |
| 29     | PMo <sub>3</sub> _NaUSY            | 110       | 3      | 68        | 37              | 59   | 2    | 8    |
| 30     | Amberlyst-15                       | 110       | 0.5    | 97        | 31              | 54   | 13   | 9    |
| 34     | Ar-SBA-15                          | 125       | 4      | 96        | 15              | 47   | 38   | 10   |
| 35     | F-SBA-15                           | 125       | 4      | 90        | 14              | 50   | 36   |      |
| 36     | Pr-SBA-15                          | 125       | 4      | 80        | 17              | 44   | 39   |      |

\*Present studies catalyst; Temp (temperature); RT (reaction temperature); Conv.(conversion); MA. (Mono-acetin); DA. (Di-acetin); TA. (Tri-acetin); (Ref.(reference))

## References

- 1 A. Patel and S. Singh, A green and sustainable approach for esterification of glycerol using 12-tungstophosphoric acid anchored to different supports: Kinetics and effect of support, *Fuel*, 2014, **118**, 358–364.
- 2 I. Kim, J. Kim and D. Lee, A comparative study on catalytic properties of solid acid catalysts for glycerol acetylation at low temperatures, *Appl. Catal. B Environ.*, 2014, **148–149**, 295–303.
- 3 I. Dosuna-Rodríguez and E. M. Gaigneaux, Glycerol acetylation catalysed by ion exchange resins, *Catal. Today*, 2012, **195**, 14–21.
- 4 L. Zhou, T. H. Nguyen and A. A. Adesina, The acetylation of glycerol over amberlyst-15: Kinetic and product distribution, *Fuel Process. Technol.*, 2012, **104**, 310–318.
- 5 M. S. Khayoon and B. H. Hameed, Synthesis of hybrid SBA-15 functionalized with molybdophosphoric acid as efficient catalyst for glycerol esterification to fuel additives, *Appl. Catal. A Gen.*, 2012, **433–434**, 152–161.
- 6 P. Ferreira, I. M. Fonseca, A. M. Ramos, J. Vital and J. E. Castanheiro, Acetylation of glycerol over heteropolyacids supported on activated carbon, *Catal. Commun.*, 2011, **12**, 573–576.
- 7 M. S. Khayoon and B. H. Hameed, Acetylation of glycerol to biofuel additives over sulfated activated carbon catalyst, *Bioresour. Technol.*, 2011, **102**, 9229–9235.

- 8 P. Ferreira, I. M. Fonseca, A. M. Ramos, J. Vital and J. E. Castanheiro, Esterification of glycerol with acetic acid over dodecamolybdophosphoric acid encaged in USY zeolite, *Catal. Commun.*, 2009, **10**, 481–484.
- 9 V. L. C. Gonçalves, B. P. Pinto, J. C. Silva and C. J. A. Mota, Acetylation of glycerol catalyzed by different solid acids, *Catal. Today*, 2008, **133–135**, 673–677.
- 10 J. A. Melero, R. van Grieken, G. Morales and M. Paniagua, Acidic mesoporous silica for the acetylation of glycerol: Synthesis of bioadditives to petrol fuel, *Energy and Fuels*, 2007, **21**, 1782–1791.
